# Supplementary material for: Optical spectroscopic studies on the complexation of stilbazolium dyes with a water soluble pillar[5]arene
Source: Royal Society of Chemistry journal article supplement (doi:10.1039/c4ra14809f), 2015-01-01
Supplement: c4ra14809f1.pdf [file c4ra14809f1.pdf]

## Optical spectroscopic studies on the complexation of stilbazolium dyes with a water soluble pillar[5]arene

Márton Bojtár,<sup>a</sup> Zoltán Szakács,<sup>b</sup> Dóra Hessz,<sup>c</sup> Miklós Kubinyi,<sup>b,c</sup> and István Bitter,<sup>a\*</sup>

<sup>a</sup> Department of Organic Chemistry and Technology, Budapest University of Technology and Economics, 1521 Budapest, Hungary

<sup>b</sup> Department of Physical Chemistry and Materials Science, Budapest, University of Technology and Economics, 1521 Budapest, Hungary

<sup>c</sup> Institute of Materials and Environmental Chemistry, Research Centre for Natural Sciences, Hungarian Academy of Sciences, 1519 Budapest, Hungary

### Electronic Supporting Information (ESI)

1. *Materials and methods*
2. *Absorption and fluorescence spectra of of G1-WPA5 and G2- WPA5 systems*
3. *Job's plots of G2-WPA5 and G3-WPA5 systems*
4. *Association constant determination*
5. *NMR spectra of G1-WPA5 system*
6. *Fluorescence decay of of G3-WPA5 complex*
7. *Sensitivity of G3-WPA5 fluorescence indicator displacement system*
8. *References*

## 1. Materials and methods

Solvents, reagents and starting materials were obtained from commercial supplier and used without further purification. **WPA5**, **G1-G3** were prepared as described before (Ref. 16-17). **DMV** diiodide salt was used. All the spectroscopic experiments were carried out at 25°C. The UV–vis absorption spectra were recorded on an Agilent 8453 diode array spectrometer. The steady-state fluorescence spectra and fluorescence decay curves were measured on an Edinburgh Instruments FLSP 920 combined steady-state and lifetime spectrometer, which uses the method of time-correlated single-photon counting for measuring the fluorescence decay. The excitation light source was a Xe900 steady state arc lamp when measuring the fluorescence spectra and an EPL 375 pulsed diode laser when the fluorescence decay curves were recorded. This diode laser emitted pulses of 130 ps fwhm (full width at half-maximum) at 378 nm. The fluorescence quantum yields of **G3** and its complex with **WPA5** were determined using cresyl violet as standard.  $^1\text{H}$  NMR spectra were taken on a Bruker Avance DRX-500 spectrometer with chemical shifts reported in ppm (the residual DMSO was used as internal standard).

## 2. Absorption and fluorescence spectra of **G1-WPA5** and **G2-WPA5** systems

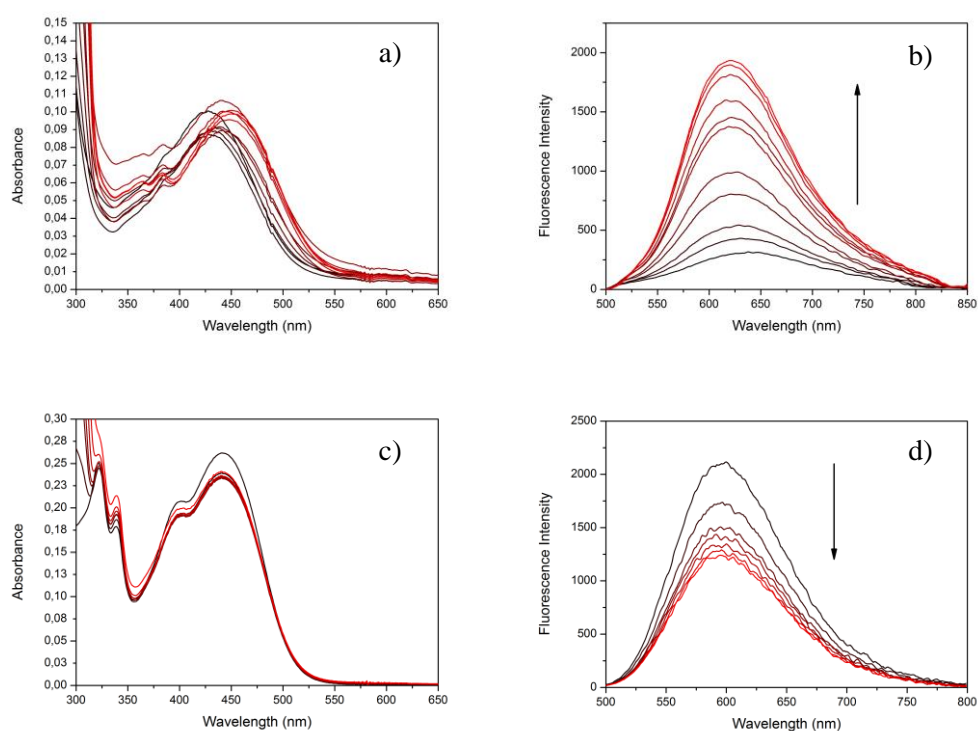

**Fig. S1** Absorption(a) and fluorescence spectra (b) of **G1** (10.0 μM) upon addition of **WPA5** (0 to 3.92 equiv.) in water (excitation at 429 nm); absorption (c) and fluorescence (d) spectra of **G2** (10.0 μM) upon addition of **WPA5** (0 to 15.2 equiv.) in water-ethanol 1:1 mixture (excitation at 441 nm),  $K_I = (2.64 \pm 0.2) \cdot 10^5 \text{ M}^{-1}$ . Note: due to *E/Z* photoisomerism of **G1**, the spectral data were not suitable for the determination of the association constant.

### 3. Job's plots of G2-WPA5 and G3- WPA5 systems

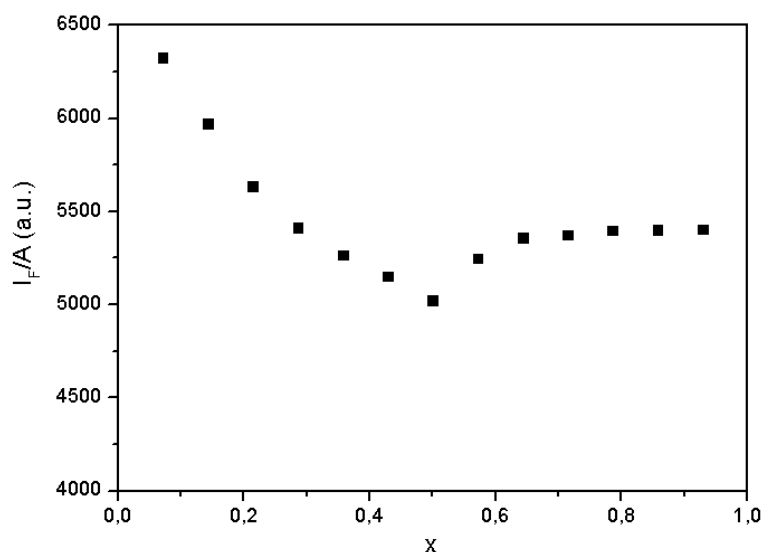

**Fig. S2.** Job's plot of the fluorescence intensity / absorbance data of **G2-WPA5** systems in water-ethanol 1:1 solvent mixtures,  $\lambda_{em} = 595$  nm,  $\lambda_{ex} = 445$  nm. The sum of the total concentrations,  $x$ , was 10  $\mu$ M, to achieve a detectable complex formation. The self-absorption of samples with higher dye concentrations was strong, causing a distortion of the triangle-shaped plot.

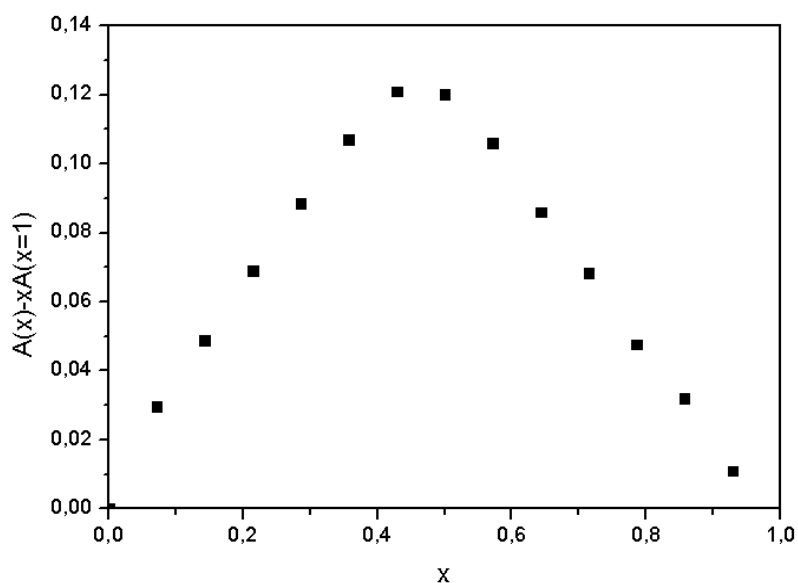

**Fig. S3** Modified Job's plot [S1] of the  $A(x)$  absorbance values of **G3 - WPA5** mixtures in aqueous solutions, measured at  $\lambda = 537$  nm.  $x$  denotes the mole fraction of **G3**,  $A(x=1)$  is the absorbance of the pure dye. The sum of the total concentrations is 50.0  $\mu$ M.

### 4. Association constant determination

The 1:1 stoichiometries of the **G2·WPA5** and **G3·WPA5** complexes were justified by Job's method (see Figs. S2 and S3). As the absorption spectrum of **G2** showed only minor changes when **WPA5** was added to its solution (see Fig S1c), the association constant  $K_1$  for the complex was determined from the fluorescence spectra of solutions with constant **G2** and different **WPA5** concentrations. The calculation is described at the end of this section.

The association constant,  $K_1$ , and the spectrum of the **G3·WPA5** complex were obtained from the absorption spectra of the free dye and of **G3·WPA5** mixtures with identical **G3**, but different **WPA5** total concentrations. For that the equilibrium concentrations of the their complex,  $c_j^{HG}$ , in the  $j$ -th solution were expressed from the equations

$$c_j^{HG} / (c_j^H c_j^G) = K_1, \quad (S1)$$

$$c_j^G + c_j^{HG} = c_0^G, \quad (S2)$$

and

$$c_j^H + c_j^{HG} = c_{0j}^H, \quad (S3)$$

( $c_0^G$  and  $c_{0j}^H$  are the total concentrations). The second order equation

$$K_1(c_j^G)^2 - (K_1c_0^G + K_1c_{0j}^H + 1)c_j^G + K_1c_0^Gc_{0j}^H = 0 \quad (S4)$$

was obtained, the root of which was substituted into the sum of squared residuals

$$S_{tot}^{abs} = \sum_{i=1}^n \sum_{j=1}^m [A_{i,j} - \varepsilon_i^{HG} c_j^{HG} - \varepsilon_i^G (c_0^G - c_j^{HG})]^2. \quad (S5)$$

In Eq. (S5)  $A_{i,j}$  is the measured absorbance,  $\varepsilon_i^G$  and  $\varepsilon_i^{HG}$  are the absorption coefficients of the respective species at the  $i$ -th wavelength.  $S_{tot}^{abs}$  has been minimized as a function of  $\varepsilon_i^{HG}$ -s and  $K_1$ . This optimization yielded  $K_1 = 1.3 \times 10^6 \text{ M}^{-1}$ , and the absorption spectrum of **WPA5·G3** complex. The latter is shown in Fig. S4, together with the spectrum of the uncomplexed dye.

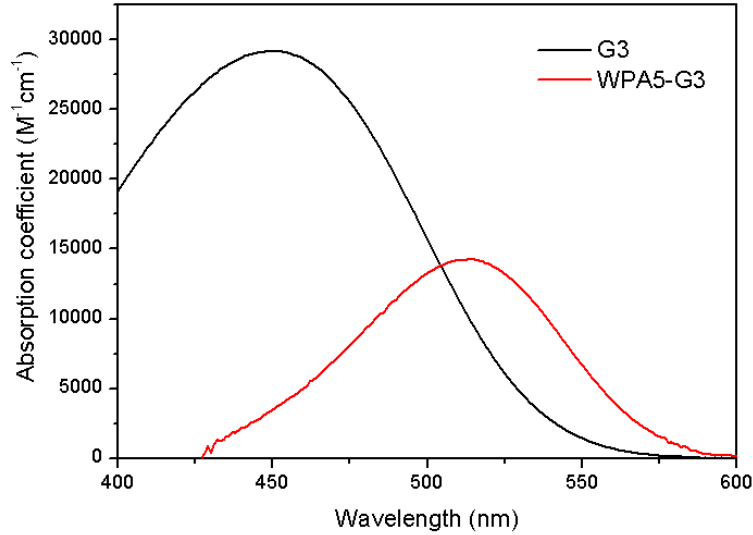

**Fig. S4.** The absorption spectrum of the **WPA5·G3** complex and the uncomplexed G3 dye.

The equilibrium constant  $K_2$  for the binding of the viologen V by the pillarene host H, has been determined from the spectra of solutions with identical dye total concentrations and identical pillarene concentrations, but with different viologen concentrations.

In the presence of the viologen, V, which forms the complex HV with the pillarene host, the equilibrium concentration of the dye complex in the  $j$ -th solution,  $c_j^{HG}$ , can be expressed from the two equilibrium constants, (S1) and

$$c_j^{HG} / (c_j^H c_j^V) = K_2, \quad (\text{S6})$$

and from the expressions for the total concentrations (S2),

$$c_j^V + c_j^{HV} = c_{0j}^V, \quad (\text{S7})$$

and

$$c_j^H + c_j^{HG} + c_j^{HV} = c_0^H. \quad (\text{S8})$$

For the equilibrium concentrations of the dye complex in the individual solutions a cubic equation was derived:

$$\begin{aligned} & (K_1 K_2 - K_1^2) (c_j^G)^3 + \left[ (2K_1^2 - K_1 K_2) (c_0^G + c_{0j}^V) + (2K_1^2 - K_1 K_2) c_0^G + K_1 K_2 c_{0j}^V + K_1 - K_2 \right] (c_j^G)^2 - \\ & - \left[ (2K_1^2 - K_1 K_2) c_0^H c_0^G + K_1 K_2 c_0^G c_{0j}^V + K_1 c_0^G + K_1^2 (c_0^G)^2 \right] c_j^G + K_1^2 (c_0^G)^2 c_0^H = 0. \end{aligned} \quad (\text{S9})$$

The value of  $K_2$  was obtained then by another least square fitting, applying Eq. (S5) for the spectra of the V-G-H systems, adopting the previously determined values for  $K_1$  and the absorption coefficients  $\varepsilon_i^{HG}$ , and using Eq. (S9) for the calculation of  $c_j^{HG}$ .

The value of  $K_1$  for **WPA5·G2** was determined from the fluorescence spectra. For that the spectra were divided by the absorbance at the excitation wavelength to compensate for the

difference of absorbance at the excitation wavelength at different host concentrations, have been corrected for the (small) inner filter effect and substituted into the sum of squared residuals

$$S_{tot}^{fl} = \sum_{i=1}^n \sum_{j=1}^m \left[ I_{i,j} - \varphi_i^{HG} c_j^{HG} - \varphi_i^G (c_0^G - c_j^{HG}) \right]^2 \quad (\text{S10})$$

In eq (S10)  $I_{i,j}$  denotes the corrected fluorescence intensity of the  $j$ -th mixture,  $\varphi_i^G$  and  $\varphi_i^{HG}$  denote the molar fluorescence intensities of the dye guest and the complex, respectively, at the  $i$ -th wavelength. Performing a minimization of  $S_{tot}^{fl}$  yielded  $K_1 = (2.64 \pm 0.2) \cdot 10^5 \text{ M}^{-1}$ .

## 5. NMR spectra of **G1**- **WPA5** system

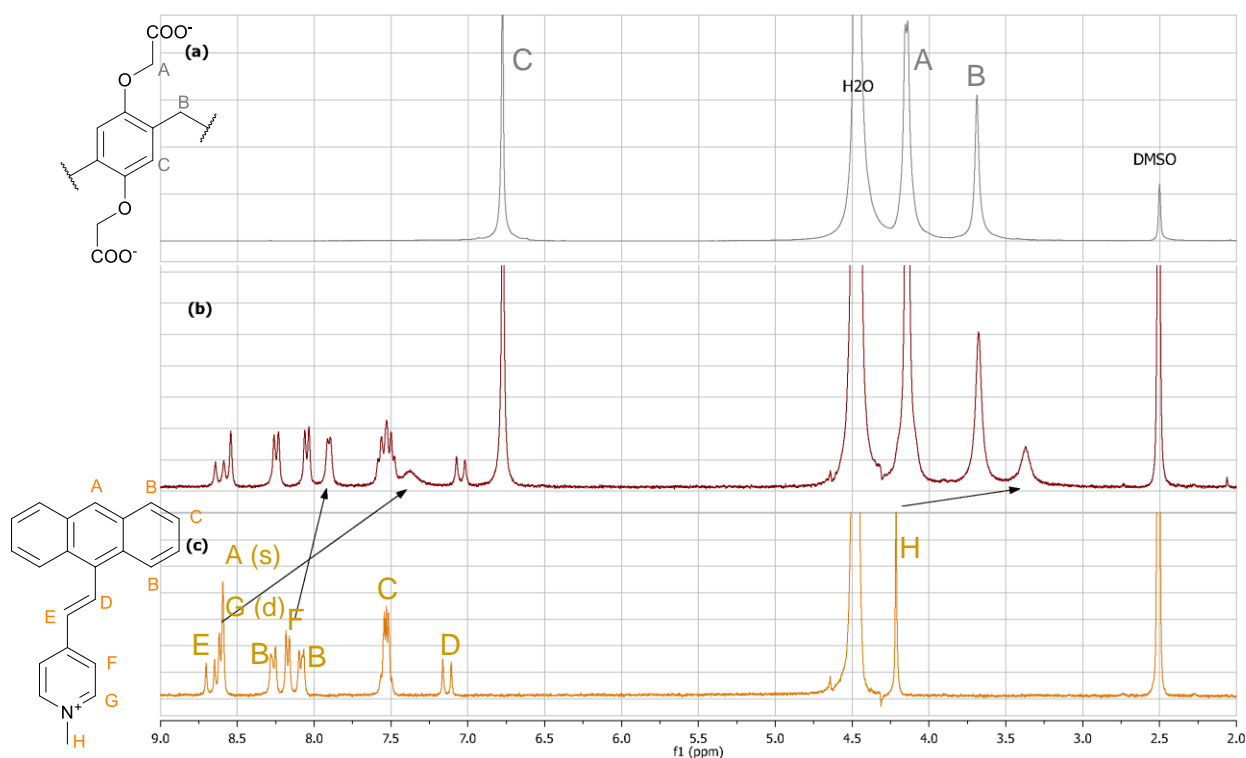

**Fig. S5** Partial <sup>1</sup>H-NMR spectra (500 MHz, D<sub>2</sub>O - DMSO-d<sub>6</sub> 1:1, 298 K) of (a5; ) **WPA5** (b) **G1** and **WPA5** (1 equiv.), (c) **G3** Note: the poor quality of the spectra is attributed to the low concentration due to the low solubility of **G1** in D<sub>2</sub>O

## 6. Fluorescence decay of WPA5·G3 complex

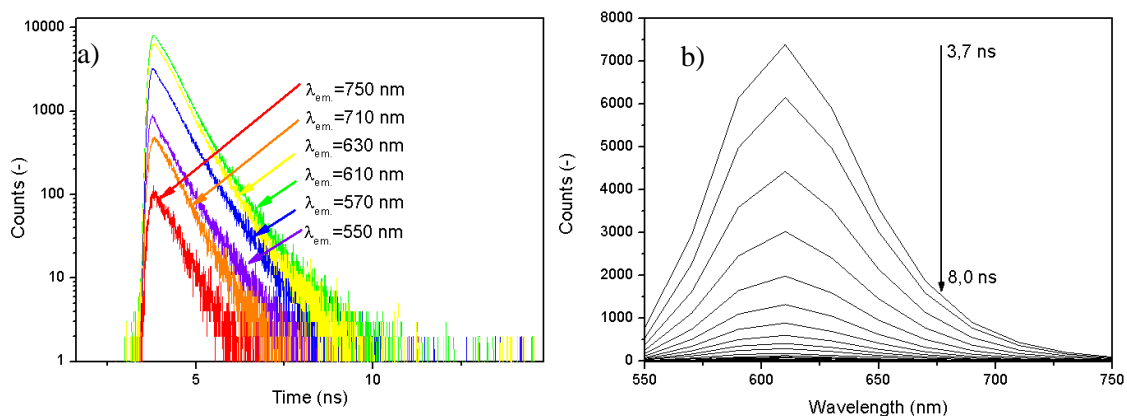

**Fig. S6.** (a) Fluorescence decay curves and (b) time-resolved emission spectra of a  $5 \times 10^{-6}$  M aqueous solution of **G3** in the presence of  $1.5 \times 10^{-5}$  M **WPA5**.

## 7. Sensitivity of G3·WPA5 fluorescence indicator displacement system

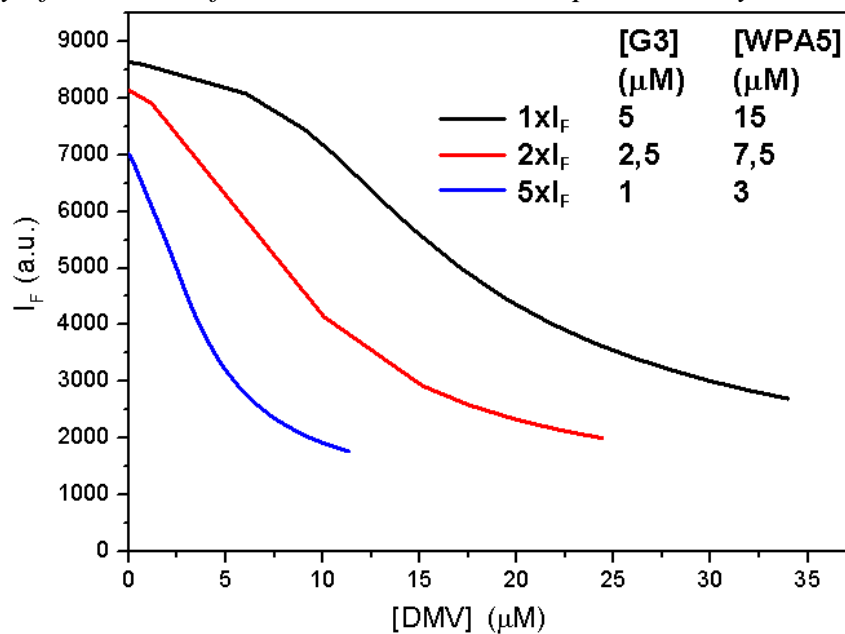

**Fig. S7.** Fluorescence intensities of **G3·WPA5** systems in the presence paraquat in various concentrations, as calculated from the association constants  $K_1$  and  $K_2$ .

## 8. *References*

[S1] K. Hirose, *J. Incl. Phenom. Macrocycl. Chem.* 2001, **39** 193-202
